# Supplementary material for: Targeting Glutathione and Cystathionine β-Synthase in Ovarian Cancer Treatment by Selenium–Chrysin Polyurea Dendrimer Nanoformulation
Source: MDPI journal article supplement (doi:10.3390/nu11102523), 2019-10-19
Supplement: s1 [file s1]

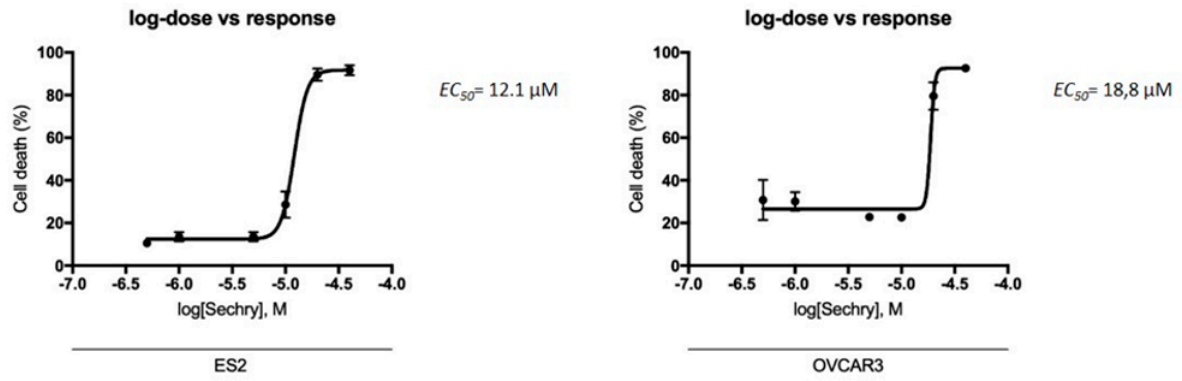

**Figure S1.** Determination of SeChry  $EC_{50}$  for ES2 and OVCAR3 cell Lines. The effective concentration 50 ( $EC_{50}$ ) was determined based on the cell death levels induced by different concentration of selenium-chrysin (SeChry) in ovarian cell lines. Cell death was determined by flow cytometry, measuring annexin V-FITC and propidium iodide (PI) levels.
